# Supplementary material for: The telomeric transcriptome of Schizosaccharomyces pombe
Source: PubMed Central journal article supplement — Nucleic Acids Res. 2011 Dec 1;40(7):2995–3005. doi: 10.1093/nar/gkr1153 (PMC3326308; doi:10.1093/nar/gkr1153), 2011-12-01
Supplement: supp_gkr1153_nar-01504-a-2011-File008.pdf [file supp_gkr1153_nar-01504-a-2011-File008.pdf]

**Supplementary Data for:**

**The telomeric transcriptome of *Schizosaccharomyces pombe***

**Amadou Bah, Harry Wischnewski, Vadim Shchepachev and Claus M.**

**Azzalin**

Institute of Biochemistry (IBC), Eidgenössische Technische Hochschule Zürich (ETHZ),

Schafmattstrasse 18, CH-8093 Zürich, Switzerland

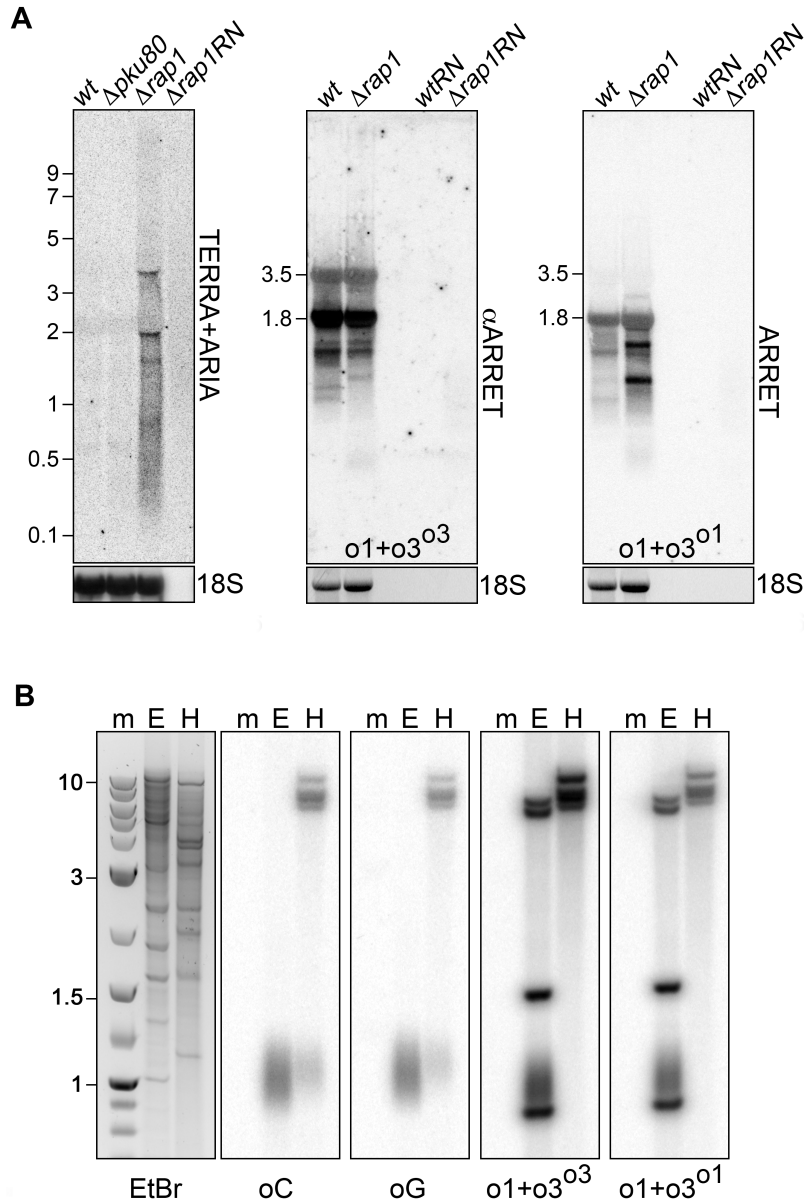

**Figure S1.** Control experiments for northern blot hybridizations. **(A)** Total RNA isolated from the indicated strains was treated with RNase A or left untreated prior to electrophoresis. RNA was then transferred to nylon membranes and hybridized with a double stranded telomeric probe detecting TERRA and ARIA simultaneously or with  $o1+o3^{o3}$  and  $o1+o3^{o1}$  probes to detect  $\alpha$ ARRET and ARRET, respectively. To control for loading and RNase efficiency, 18S rRNA was detected by hybridization or Ethidium Bromide staining. Marker molecular weights are on the left in kb. **(B)** Genomic DNA was prepared from wt yeasts according to standard procedure. DNA was digested with *Eco*RI (E) or *Hind*III (H), electrophoresed and transferred to nylon membranes. Membranes were hybridized using the indicated probes and exposed in parallel. One typical example of Ethidium Bromide (EtBr) stained DNA is shown on the left together with marker molecular weights in kb.



**Supplementary Table S1.** Oligonucleotides used in this study

| Name             | Sequence (5'-3')                     | Application                   |
|------------------|--------------------------------------|-------------------------------|
| o1               | GAAGTTCACTCAGTCATAATTAATTGGGTAAC     | PCR, RT-PCR, NB               |
| o2               | GAAGTTCACTCAGTCATAATTAATTGGGTAACGGAG | PCR, RT-PCR, NB               |
| o3               | GGGCCCAATAGTGGGGGCATTGTATTTGTG       | PCR, RT-PCR, NB, 3' & 5' RACE |
| oC               | TGTAACCGTGTAAACCACGTAACCTTGTAAACCC   | PCR, RT-PCR, NB, RNA-FISH     |
| oG               | GGGTTACAAGGTTACGTGGTTACACGGTTACA     | PCR, RT-PCR, NB, RNA-FISH     |
| U6               | ATGTCGCAGTGTCATCCTTG                 | NB                            |
| U6 <sup>IN</sup> | GTATGACTCGAACCTTGGTAAATATTGTTACTTAC  | NB                            |
| 35/32SA          | ATTCCCAAAAAGTTAAAAGATGGAAA           | NB                            |
| 35/32SB          | TTAGATATAATTAATTCAGACTTC             | NB                            |
| 18S              | TCAATAAAGAACATGAGTAGTTTGCCAGAA       | NB                            |
| act1             | ATCCTTTTGTCCCATACCTACCATAATACC       | NB                            |
| act1RT-Fw        | TGCCGATCGTATGCAAAAGG                 | RT-PCR, CHIP                  |
| act1RT-Rv        | CCGCTCTCATCATACTCTTG                 | RT-PCR, CHIP                  |
| Poly(T)          | (T) <sub>20</sub>                    | RT-PCR                        |
| o5o              | AGCCTCGCCTTACGGCTCGGCTGACGGGTG       | 5' RACE                       |
| o3i              | TGAATACCGTATTTCAATTTCTATTTCTTTA      | 3' RACE                       |
| TSS-Fw           | TATTTCTTTATTCAACTTACCGCACTTC         | ChIP                          |
| TSS-Rv           | CAGTAGTGCAGTGATTATGATAATTAATGATGG    | ChIP                          |

NB: northern blot
